# Supplementary material for: Elevated Expression of H19 and Igf2 in the Female Mouse Eye
Source: PubMed Central journal article supplement (PMC3577879; doi:10.1371/journal.pone.0056611), 2013-02-20

Figure S1

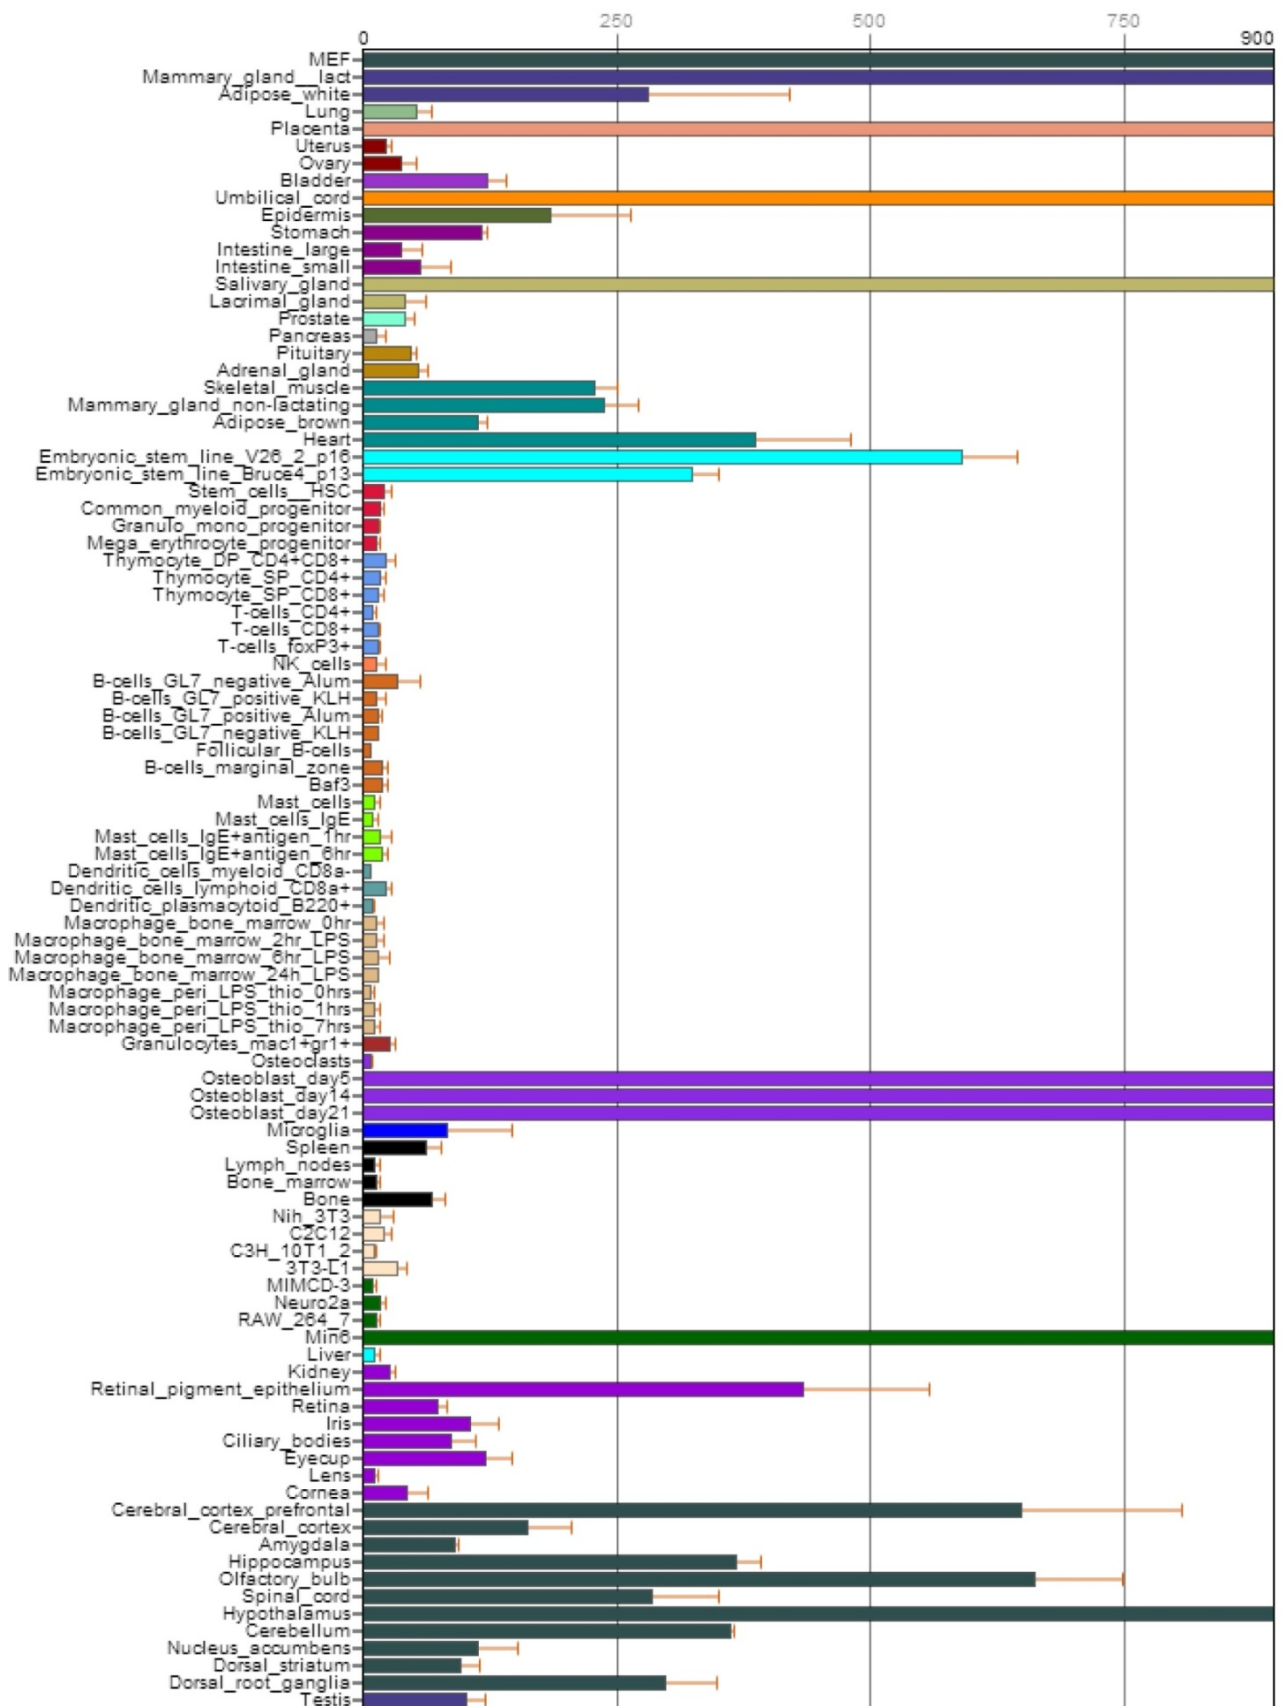

Supplement: pone.0056611.s001.pdf [file pone.0056611.s001.pdf]
