# Supplementary material for: Elevated Expression of H19 and Igf2 in the Female Mouse Eye
Source: PubMed Central journal article supplement (PMC3577879; doi:10.1371/journal.pone.0056611), 2013-02-20
Supplement: pone.0056611.s002.pdf [file pone.0056611.s002.pdf]

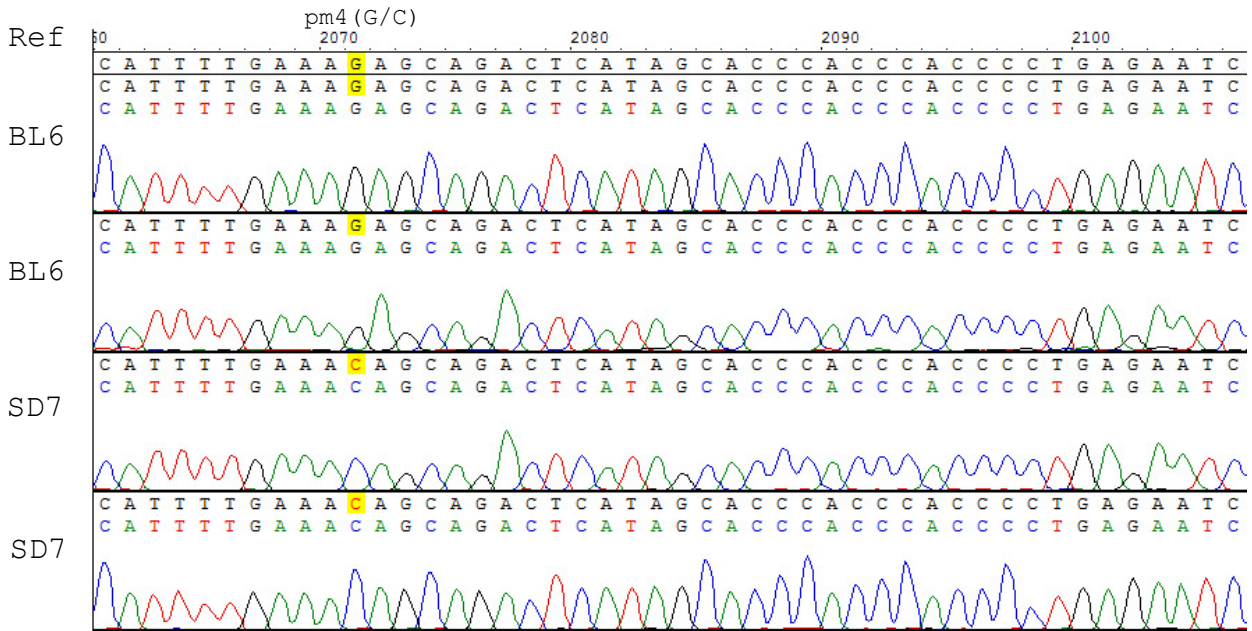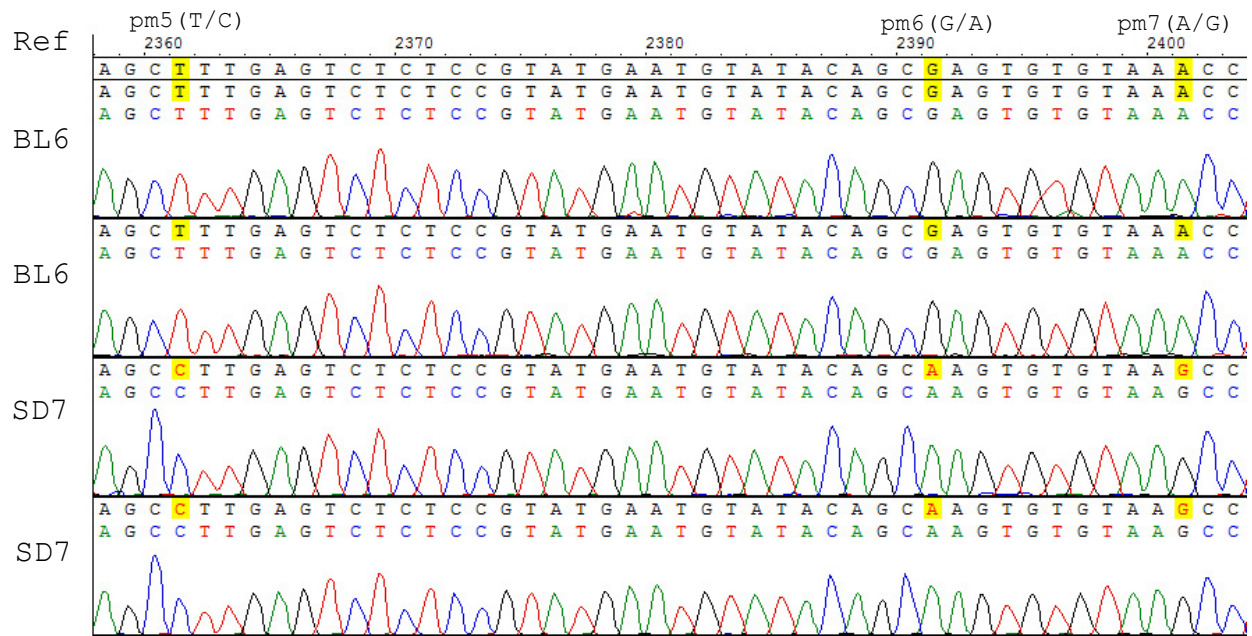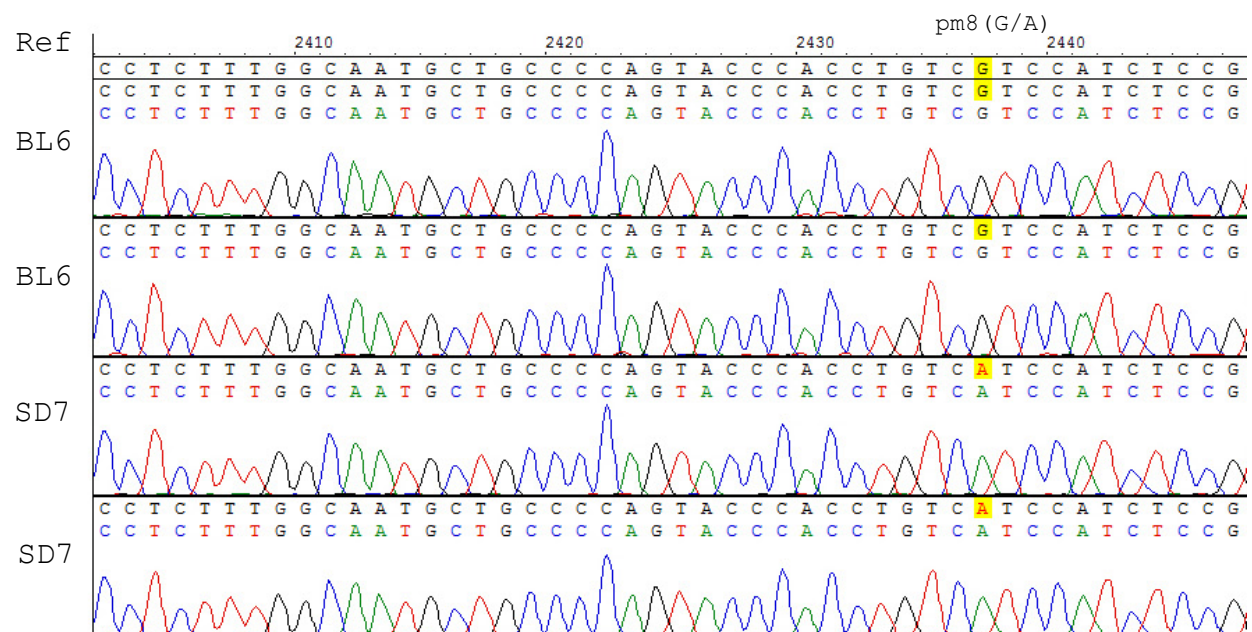

Figure S2 B

Thu Apr 26, 2012 18:59 +0200  
H19\_Ref\_ENSMUST00000136359\_NCBIM37\_chr7\_149761434-149764048\_str\_-1.str from 1 to 2615  
Alignment to  
H19\_SD7\_Seq.ape from 1 to 915

Matches (|):907  
Mismatches (#):7  
Gaps ( ):1702  
Unattempted(.):0

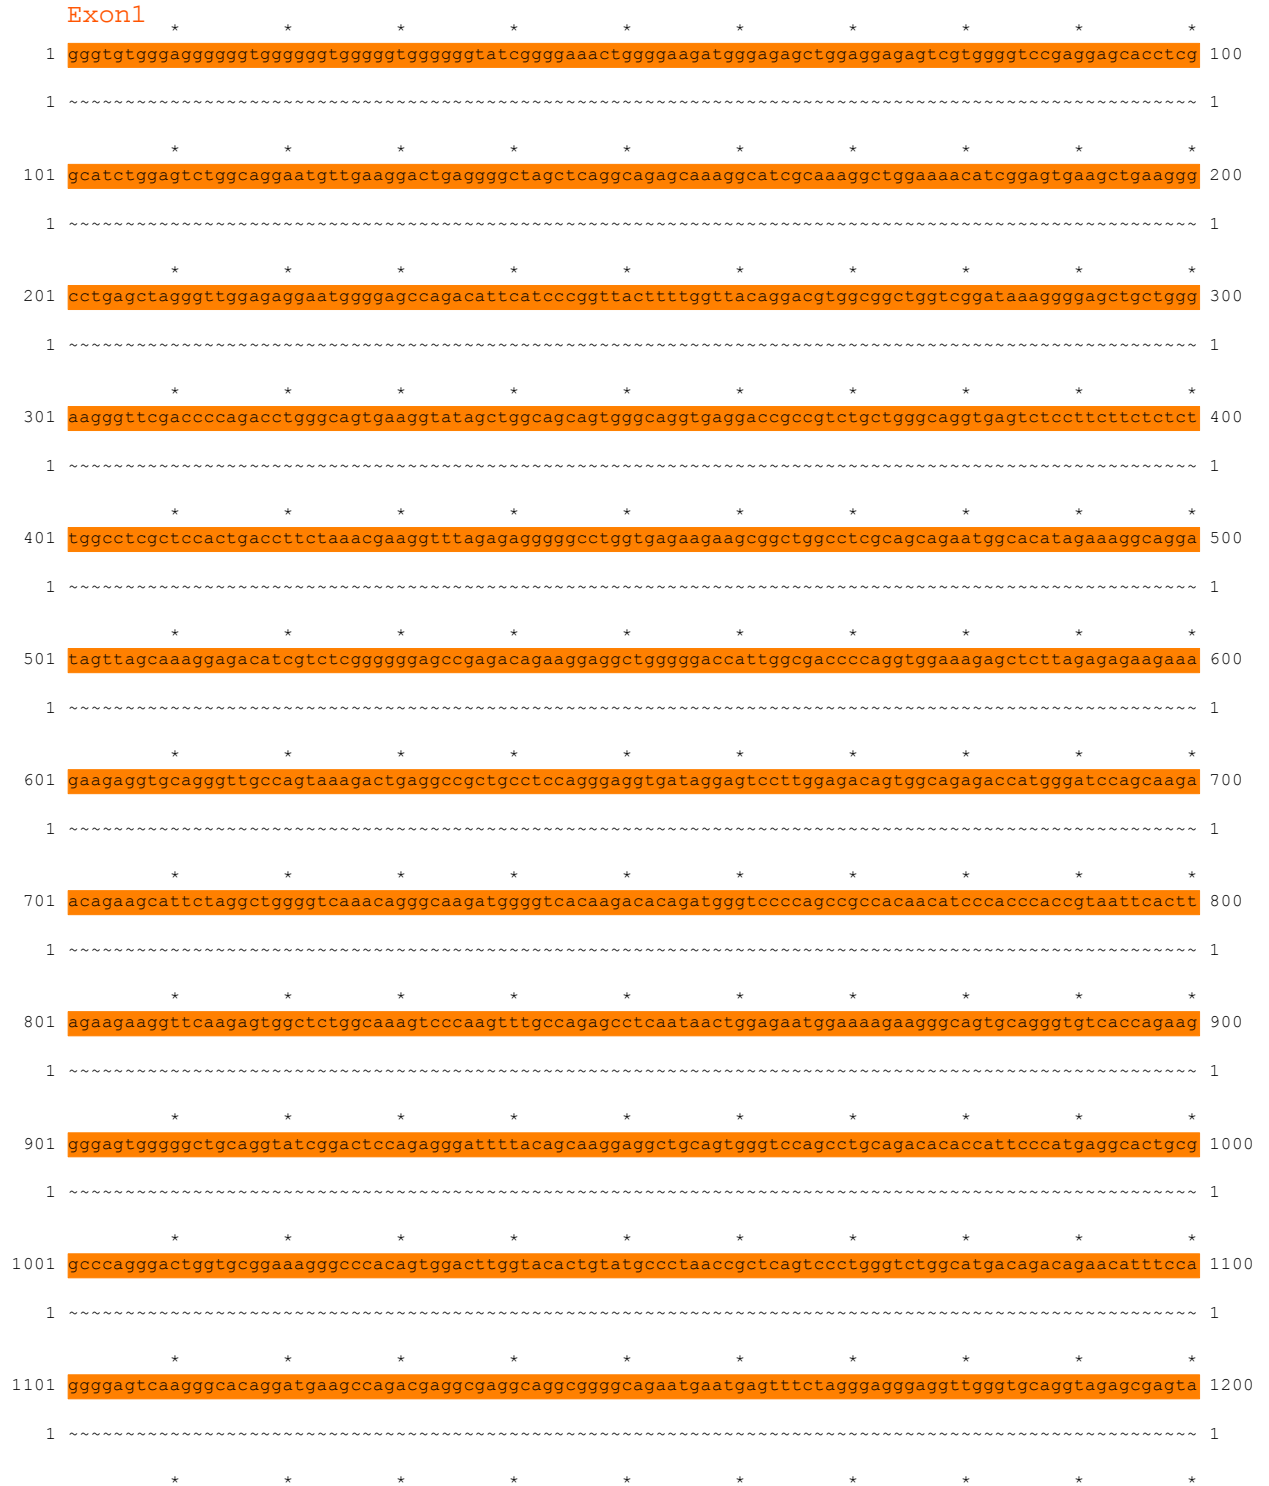





850 CTCTTTGGCAATGCTGCCCCAGTACCCACCTGTCATCCATCTCCGTCTGAGGGCAACTGGGTGTGG~~~~~ 915

\* \* \* \* \*  
\* \* \* \* \*

2500 gtctggaagcagttccatcataaagtgttcaaatgcctacttcatcctttgccctcctcaccagggcctcaccagaggtcctgggtccatcaataaa 2599

915 ~~~~~ 915

\* \*  
2600 tacagttacagtcatt 2615

915 ~~~~~ 915
